# Supplementary material for: Ultrasensitive multiwall carbon nanotube-mesoporous MCM-41 hybrid-based platform for the electrochemical detection of ascorbic acid
Source: Royal Society of Chemistry journal article supplement (doi:10.1039/d2an00473a), 2022-01-01
Supplement: d2an00473a1.pdf [file d2an00473a1.pdf]

## Supplementary information

### Ultrasensitive multiwall carbon nanotube-mesoporous MCM-41 hybrid-based platform for the electrochemical detection of ascorbic acid

Virginia M. Vaschetti,<sup>a,c,#</sup> Benjamín N. Viada,<sup>a,#</sup> Alejandro Tamborelli,<sup>a,c</sup> Griselda A. Eimer,<sup>b</sup> Gustavo A. Rivas,<sup>c,\*</sup> and Pablo R. Dalmasso<sup>a,\*</sup>

<sup>a</sup> CIQA, CONICET, Departamento de Ingeniería Química, Facultad Regional Córdoba, Universidad Tecnológica Nacional, Maestro López esq. Cruz Roja Argentina, 5016 Córdoba, Argentina.

<sup>b</sup> CITeQ, CONICET-UTN, Facultad Regional Córdoba, Universidad Tecnológica Nacional, Maestro López esq. Cruz Roja Argentina, 5016 Córdoba, Argentina.

<sup>c</sup> INFIQC, CONICET-UNC, Departamento de Fisicoquímica, Facultad de Ciencias Químicas, Universidad Nacional de Córdoba, Ciudad Universitaria, 5000 Córdoba, Argentina.

\* Corresponding authors, e-mail addresses: [grivas@fcq.unc.edu.ar](mailto:grivas@fcq.unc.edu.ar), [gustavo.rivas@unc.edu.ar](mailto:gustavo.rivas@unc.edu.ar) (G.A. Rivas), [pdalmasso@frc.utn.edu.ar](mailto:pdalmasso@frc.utn.edu.ar), [p-dalmasso@hotmail.com](mailto:p-dalmasso@hotmail.com) (P.R. Dalmasso).

# Equal contribution

## Table of contents

1. **Fig. S1** SEM images of MCM-41 at two different magnifications.

2. **Fig. S2** Cyclic voltammograms for  $1.00 \times 10^{-3}$  M AA at GCE modified with  $0.50 \text{ mg mL}^{-1}$  MWCNTs/ $0.50 \text{ mg mL}^{-1}$  MCM-41 hybrid prepared via dispersion in: (a) water, (b) DMF, (c) ethanol, (d) water/ethanol, (e) DMF/water, and (f) DMF/ethanol. Scan rate:  $0.100 \text{ V s}^{-1}$ . Supporting electrolyte:  $0.050 \text{ M}$  phosphate buffer pH 7.40.

3. **Fig. S3** Macroscopic stability of the  $0.50 \text{ mg mL}^{-1}$  MWCNTs/ $0.50 \text{ mg mL}^{-1}$  MCM-41 hybrid in water, ethanol, DMF, water/ethanol, DMF/ethanol, and DMF/water. Images obtained immediately after preparation (A), and after 15 min (B) or 24 h (C) stored at room temperature.

**Fig. S4** Predicted values of the AA oxidation peak current versus experimental values from RSM design.

**Fig. S5** SEM, elemental mapping for O, Si, and C, and EDX analysis of GCE modified with different MWCNT/MCM-41 hybrids in DMF. (A)  $0.75 \text{ mg mL}^{-1}$  MWCNTs; (B)  $0.75 \text{ mg mL}^{-1}$  MWCNTs/ $0.25 \text{ mg mL}^{-1}$  MCM-41; (C)  $0.75 \text{ mg mL}^{-1}$  MWCNTs/ $0.50 \text{ mg mL}^{-1}$  MCM-41; (D)  $0.75 \text{ mg mL}^{-1}$  MWCNTs/ $0.75 \text{ mg mL}^{-1}$  MCM-41. Sonication time = 30 min.

**Fig. S6** Cyclic voltammetric response for  $5.00 \times 10^{-4}$  M AA in  $0.050 \text{ M}$  phosphate buffer solution pH 7.40 on GCE/MWCNT–MCM-41 at scan rates of (a) 0.010, (b) 0.025, (c) 0.050, (d) 0.100, (e) 0.200, (f) 0.300, and (g)  $0.400 \text{ V s}^{-1}$ . Inset displays plot of oxidation peak current versus square root of scan rate.

**Fig. S7** Graphical representation of (A) repeatability, (B) reproducibility, and (C) stability of GCE/MWCNT–MCM-41 based on sensitivity towards AA obtained from amperometric experiments performed at  $0.000 \text{ V}$  in  $0.050 \text{ M}$  phosphate buffer solution pH = 7.40.

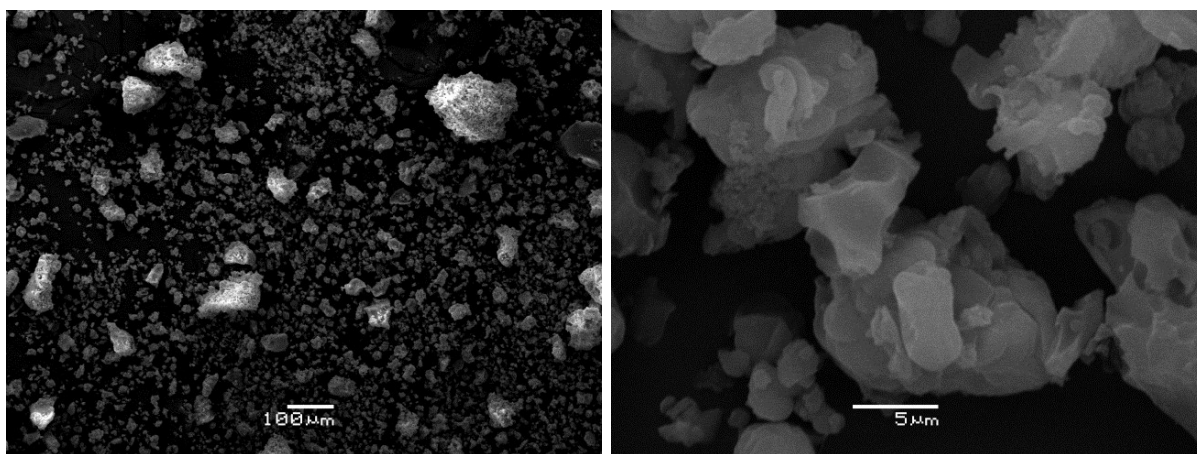

**Fig. S1** SEM images of MCM-41 at two different magnifications.

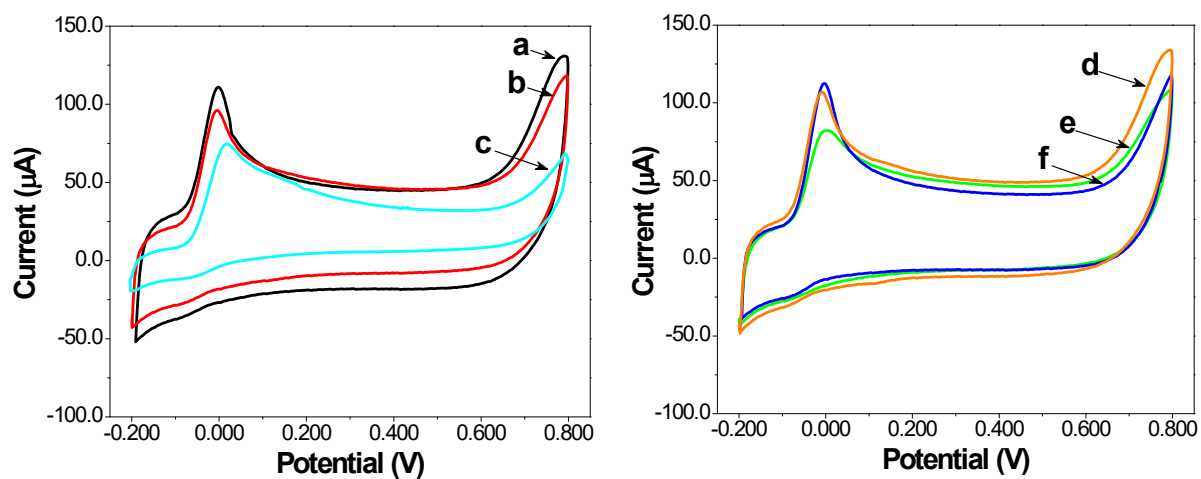

**Fig. S2** Cyclic voltammograms for  $1.00 \times 10^{-3}$  M AA at GCE modified with  $0.50 \text{ mg mL}^{-1}$  MWCNTs/ $0.50 \text{ mg mL}^{-1}$  MCM-41 hybrid prepared via dispersion in: **(a)** water, **(b)** DMF, **(c)** ethanol, **(d)** water/ethanol, **(e)** DMF/water, and **(f)** DMF/ethanol. Scan rate:  $0.100 \text{ V s}^{-1}$ . Supporting electrolyte:  $0.050 \text{ M}$  phosphate buffer pH 7.40.

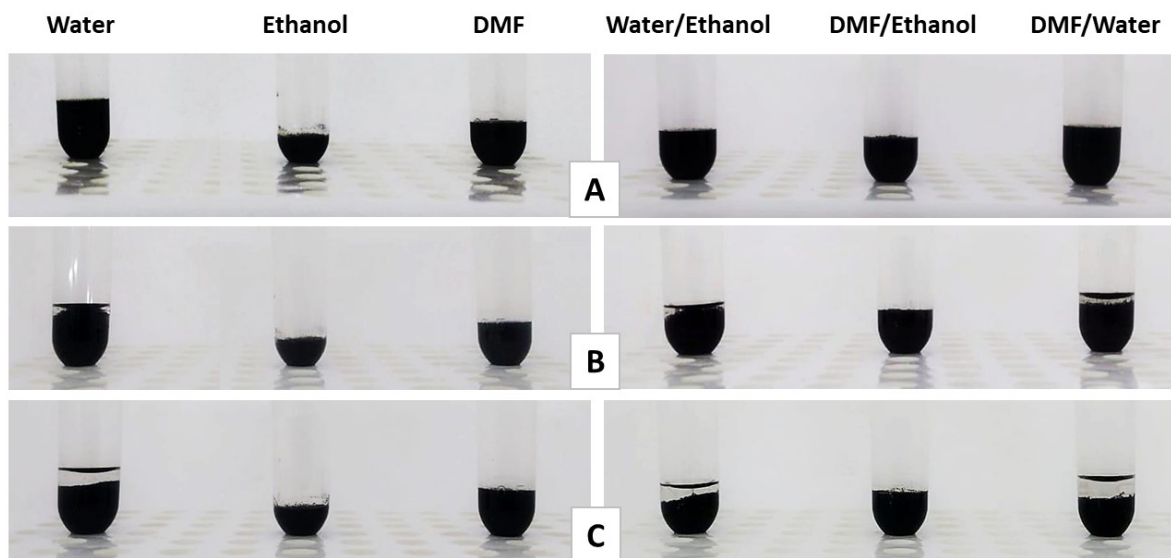

**Fig. S3** Macroscopic stability of the  $0.50 \text{ mg mL}^{-1}$  MWCNTs/ $0.50 \text{ mg mL}^{-1}$  MCM-41 hybrid in water, ethanol, DMF, water/ethanol, DMF/ethanol, and DMF/water. Images obtained immediately after preparation (**A**), and after 15 min (**B**) or 24 h (**C**) stored at room temperature.

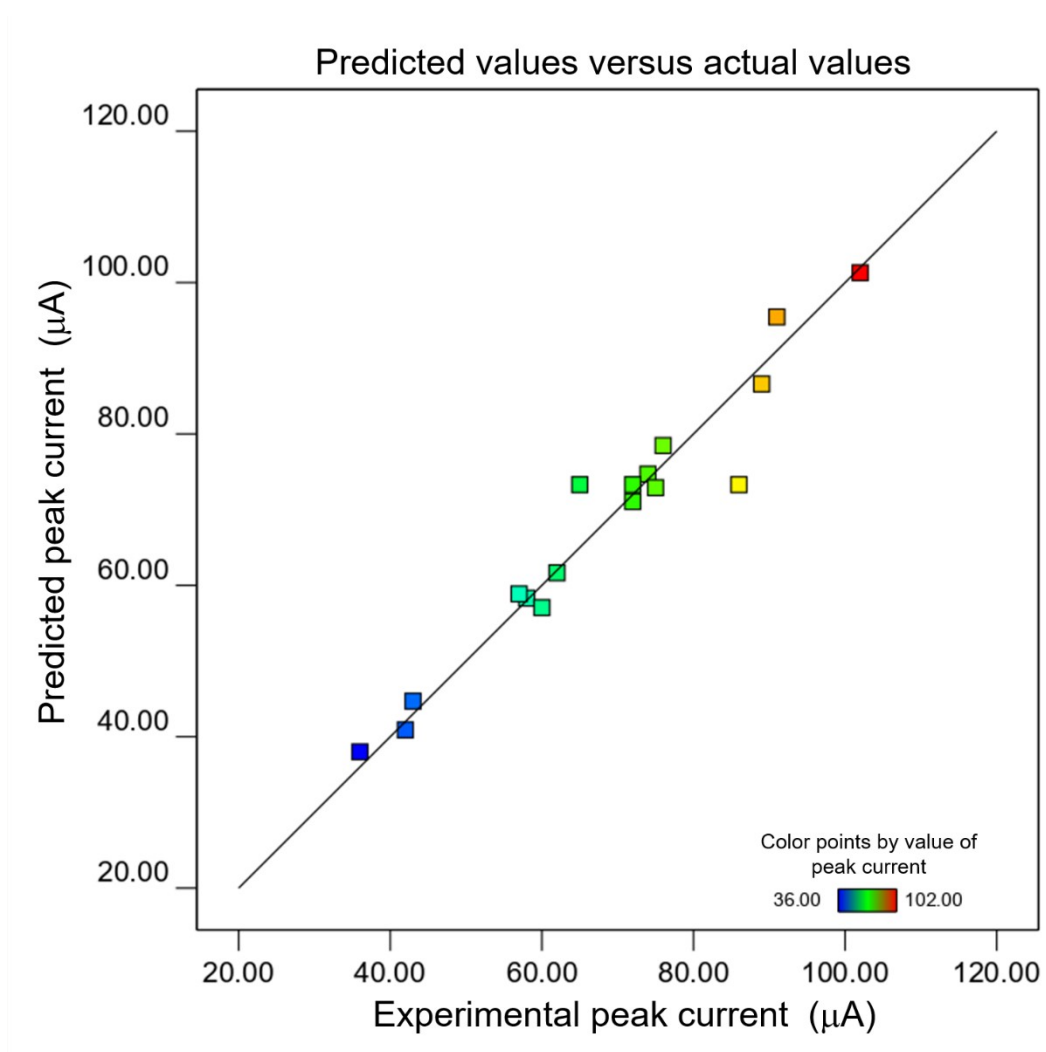

**Fig. S4** Predicted values of the AA oxidation peak current versus experimental values from RSM design.

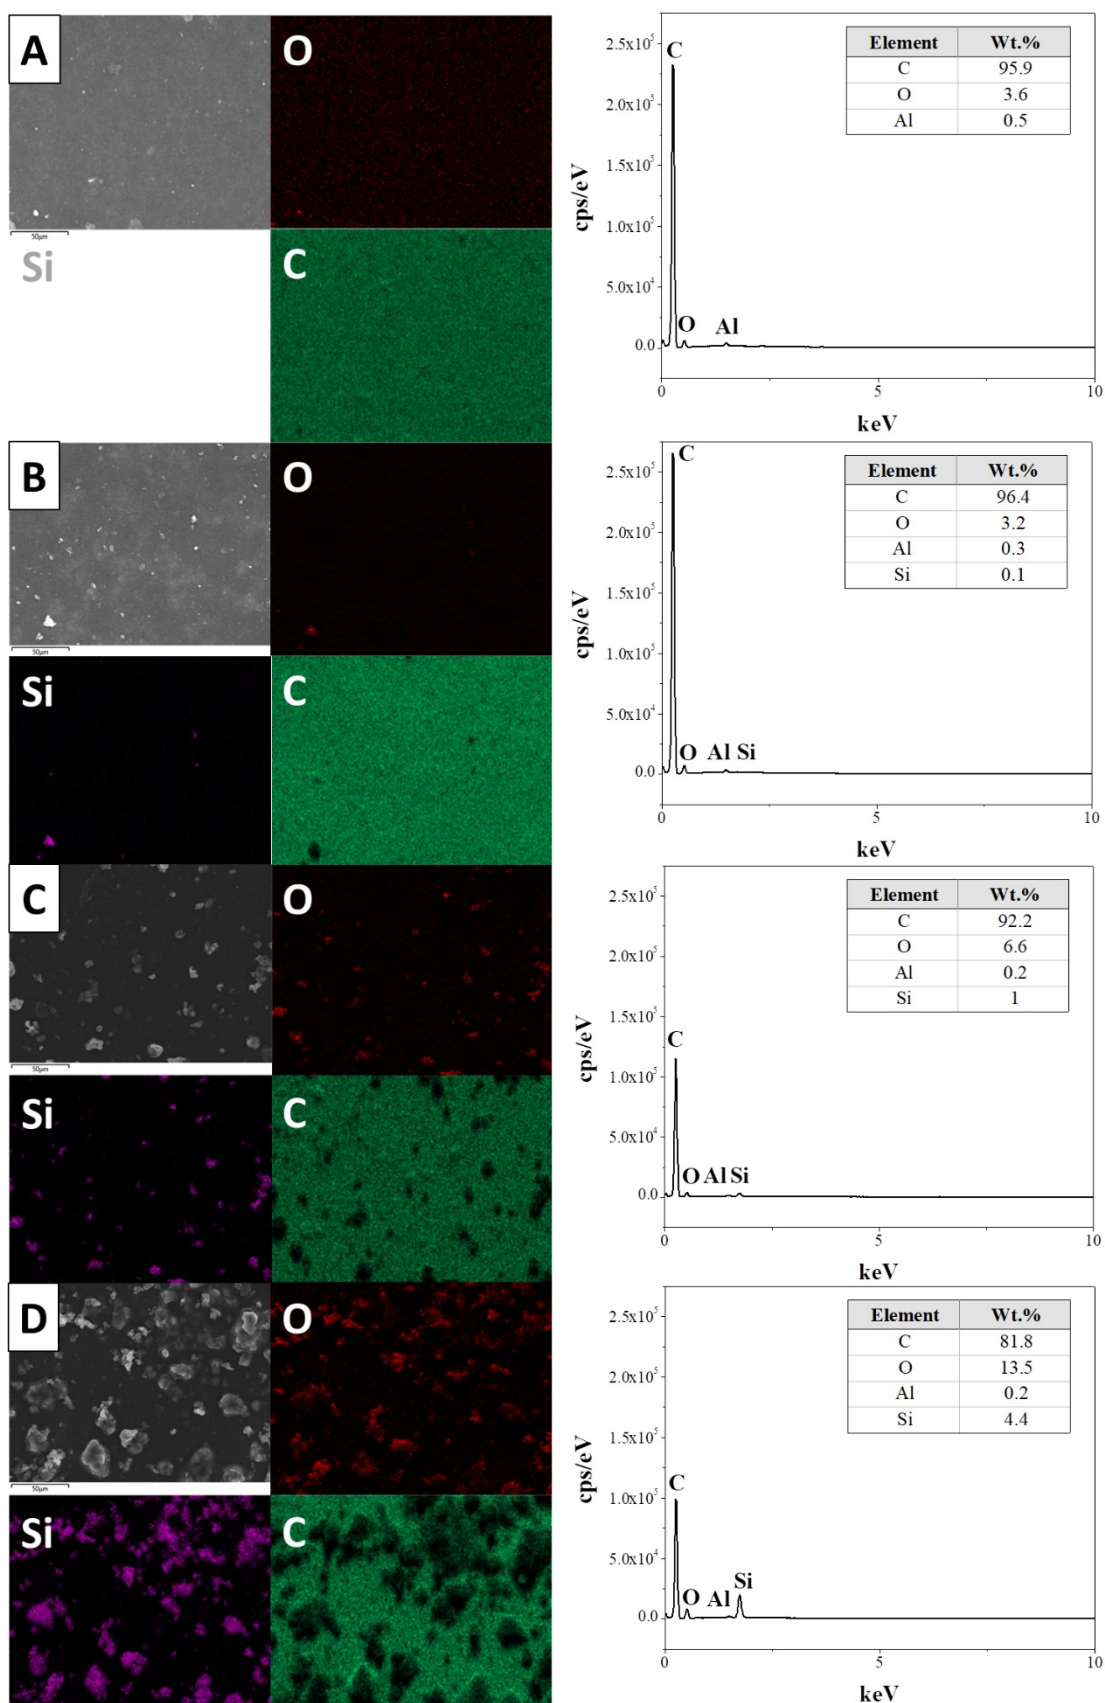

**Fig. S5** SEM, elemental mapping for O, Si, and C, and EDX analysis of GCE modified with different MWCNT/MCM-41 hybrids in DMF. **(A)** 0.75 mg mL<sup>-1</sup> MWCNTs; **(B)** 0.75 mg mL<sup>-1</sup> MWCNTs/0.25 mg mL<sup>-1</sup> MCM-41; **(C)** 0.75 mg mL<sup>-1</sup> MWCNTs/0.50 mg mL<sup>-1</sup> MCM-41; **(D)** 0.75 mg mL<sup>-1</sup> MWCNTs/0.75 mg mL<sup>-1</sup> MCM-41. Sonication time = 30 min.

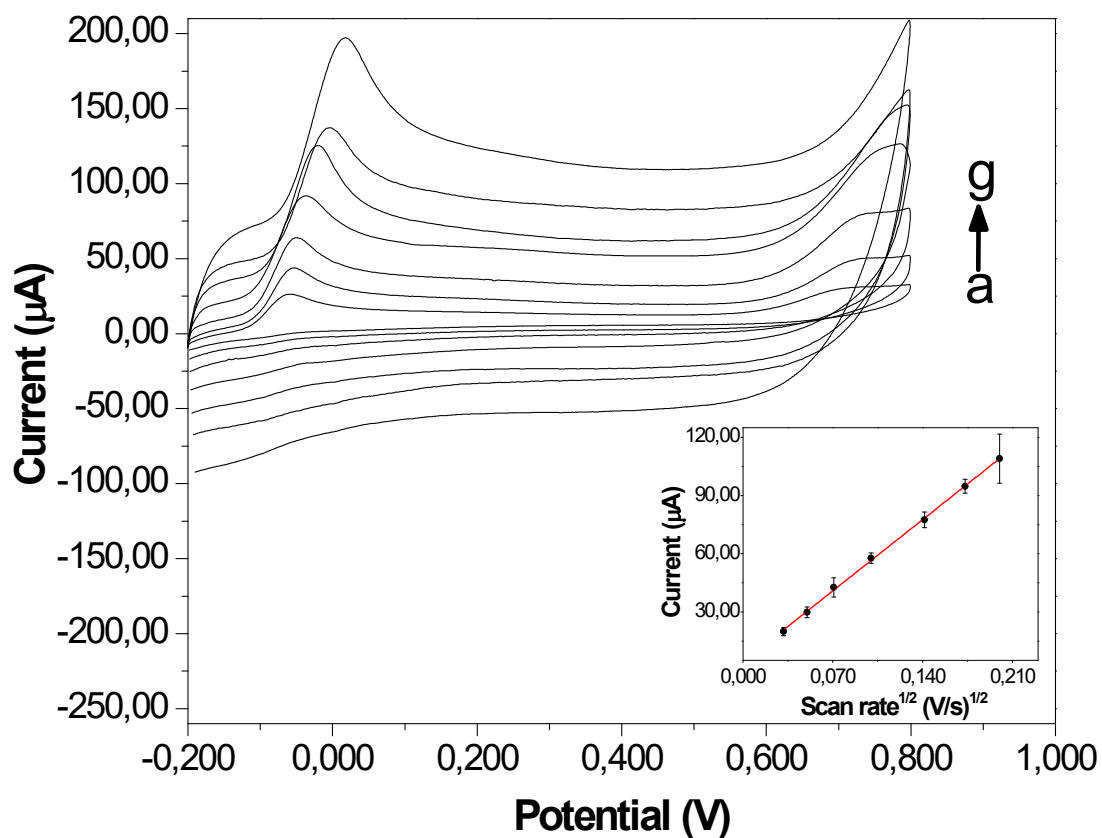

**Fig. S6** Cyclic voltammetric response for  $5.00 \times 10^{-4}$  M AA in 0.050 M phosphate buffer solution pH 7.40 on GCE/MWCNT–MCM-41 at scan rates of (a) 0.010, (b) 0.025, (c) 0.050, (d) 0.100, (e) 0.200, (f) 0.300, and (g) 0.400  $\text{V s}^{-1}$ . Inset displays plot of oxidation peak current versus square root of scan rate.



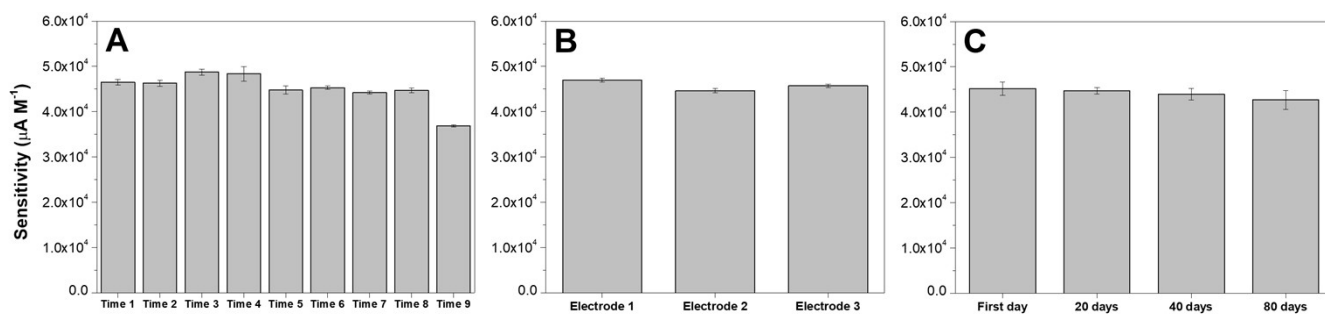

**Fig. S7** Graphical representation of (A) repeatability, (B) reproducibility, and (C) stability of GCE/MWCNT-MCM-41 based on sensitivity towards AA obtained from amperometric experiments performed at 0.000 V in 0.050 M phosphate buffer solution pH = 7.40.
